# Supplementary material for: A model of anti-angiogenesis: differential transcriptosome profiling of microvascular endothelial cells from diffuse systemic sclerosis patients
Source: Springer Nature journal article supplement (doi:10.1186/ar2002), 2006-07-19
Supplement: Additional file 2 [file ar2002-s2.pdf]

**Additional file 2. Differentially expressed genes involved in angiogenesis.**

| Gene and biological function                                                                                                                     | Symbol         | GenBank   | Unigene | M    | LOR   |
|--------------------------------------------------------------------------------------------------------------------------------------------------|----------------|-----------|---------|------|-------|
| <b>CELL MIGRATION/INVASION</b>                                                                                                                   |                |           |         |      |       |
| ↑(1) <b>Metallothionein 1A (functional)</b><br><i>Regulation of Zn and Cu availability</i>                                                       | <b>MT1A</b>    | K01383    | 440939  | 3.25 | 23.81 |
| ↑(2) <b>Plasminogen activator, tissue</b><br><i>Degradation of provisional fibrin matrix</i>                                                     | <b>PLAT</b>    | M15518    | 491582  | 2.23 | 11.50 |
| ↑(6) <b>Angiopoietin-like 4</b><br><i>Positive regulation of angiogenesis</i>                                                                    | <b>ANGPTL4</b> | NM_016109 | 9613    | 1.97 | 8.75  |
| ↑(8) <b>Connective tissue growth factor</b><br><i>Positive regulation of angiogenesis, ECM synthesis</i>                                         | <b>CTGF</b>    | X78947    | 410037  | 1.80 | 6.71  |
| ↑(10) <b>Enolase 1, (alpha)</b><br><i>Binding of plasminogen, ECM degradation</i>                                                                | <b>ENO1</b>    | M14328    | 517145  | 1.67 | 5.79  |
| ↑(19) <b>Metallothionein 2A</b><br><i>Regulation of Zn and Cu availability</i>                                                                   | <b>MT2A</b>    | V00594    | 418241  | 1.50 | 2.44  |
| ↑(20) <b>Sparc/osteonectin, cwcv and kazal-like domains proteoglycan (testican)</b><br><i>Protease inhibition, ECM stabilization</i>             | <b>SPOCK</b>   | AF231124  | 124611  | 1.46 | 3.15  |
| ↑(21) <b>Metallothionein 1E (functional)</b><br><i>Regulation of Zn and Cu availability</i>                                                      | <b>MT1E</b>    | M10942    | 534330  | 1.43 | 2.20  |
| ↑(23) <b>Cyclin D1 (PRAD1: parathyroid adenomatosis 1)</b><br><i>Cytokinesis, invasion</i>                                                       | <b>CCND1</b>   | X59798    | 523852  | 1.40 | 2.83  |
| ↑(34) <b>Calpain 2, (m/II) large subunit</b><br><i>Proteolysis and peptidolysis, cytoskeletal Remodelling, invasion</i>                          | <b>CAPN2</b>   | M23254    | 350899  | 1.28 | 2.58  |
| ↑(42) <b>Macrophage migration inhibitory factor (glycosylation- inhibiting factor)</b><br><i>Positive regulation of angiogenesis</i>             | <b>MIF</b>     | L19686    | 407995  | 1.24 | 2.43  |
| ↑(46) <b>WD repeat domain 1 (WDR1)</b><br><i>Cytoskeletal remodelling, mitotic cell rounding</i>                                                 | <b>WDR1</b>    | AF020056  | 128548  | 1.21 | 2.24  |
| ↑(47) <b>Metallothionein 1B (functional)</b><br><i>Regulation of Zn and Cu availability</i>                                                      | <b>MT1B</b>    | M13485    | 36102   | 1.20 | 0.16  |
| ↑(51) <b>Interleukin 8</b><br><i>Positive regulation of angiogenesis</i>                                                                         | <b>IL8</b>     | M17017    | 624     | 1.18 | 2.05  |
| ↑(69) <b>A disintegrin and metalloproteinase domain 15 (metargidin)</b><br><i>Proteolysis and peptidolysis</i>                                   | <b>ADAM15</b>  | U41767    | 312098  | 1.06 | 1.32  |
| ↑(88) <b>ARP3 actin-related protein 3 homolog (yeast)</b><br><i>Cell motility, control of actin polymerization</i>                               | <b>ACTR3</b>   | NM_005721 | 433512  | 1.00 | 0.96  |
| ↑(96) <b>Actinin, alpha 4</b><br><i>Cell motility, cytoskeleton dysregulation</i>                                                                | <b>ACTN4</b>   | U48734    | 270291  | 0.96 | 0.79  |
| ↑(99) <b>Nuclear receptor subfamily 2, group F, member 2</b><br><i>Positive regulator of angiopoietin-1</i>                                      | <b>NR2F2</b>   | M64497    | 347991  | 0.95 | 0.54  |
| ↑(108) <b>Alanyl (membrane) aminopeptidase (aminopeptidase N, aminopeptidase M, microsomal aminopeptidase, CD13, p150)</b><br><i>Proteolysis</i> | <b>ANPEP</b>   | M22324    | 1239    | 0.93 | 0.27  |
| ↑(112) <b>Plasminogen activator, urokinase</b><br><i>ECM and provisional fibrin matrix degradation</i>                                           | <b>PLAU</b>    | X02419/   | 77274   | 0.92 | 0.42  |
| ↑(124) <b>Actin related protein 2/3 complex, subunit 2, 34kDa</b><br><i>Cell motility, control of actin polymerization</i>                       | <b>ARPC2</b>   | U50523    | 529303  | 0.89 | 0.23  |
| ↑(130) <b>Hepatoma-derived growth factor (high-mobility group protein 1-like)</b><br><i>Positive regulation of angiogenesis</i>                  | <b>HDGF</b>    | L24521    | 506748  | 0.84 | 0.21  |

|                                                                                                                                       |               |           |        |       |       |
|---------------------------------------------------------------------------------------------------------------------------------------|---------------|-----------|--------|-------|-------|
| ↓(9) <b>Plexin B1</b><br><i>Semaphorin receptor activity and binding, cell migration</i>                                              | <b>PLXNB1</b> | AJ011414  | 476209 | -1.19 | 1.99  |
| ↓(18) <b>Kallikrein 12</b><br><i>Positive regulation of EC migration and of capillary morphogenesis</i>                               | <b>KLK12</b>  | AF135025  | 411572 | -1.08 | 1.39  |
| <b>PROLIFERATION</b>                                                                                                                  |               |           |        |       |       |
| ↑(1) <b>Metallothionein 1A (functional)</b><br><i>Regulation of Zn and Cu availability</i>                                            | <b>MT1A</b>   | K01383    | 440939 | 3.25  | 23.81 |
| ↑(8) <b>Connective tissue growth factor</b><br><i>Positive regulation of angiogenesis, ECM synthesis</i>                              | <b>CTGF</b>   | X78947    | 410037 | 1.80  | 6.71  |
| ↑(19) <b>Metallothionein 2A</b><br><i>Regulation of Zn and Cu availability</i>                                                        | <b>MT2A</b>   | V00594    | 418241 | 1.50  | 2.44  |
| ↑(20) <b>Sparc/osteonectin, cwcv and kazal-like domains proteoglycan (testican)</b><br><i>Calcium ion binding: cell proliferation</i> | <b>SPOCK</b>  | AF231124  | 124611 | 1.46  | 3.15  |
| ↑(21) <b>Metallothionein 1E (functional)</b><br><i>Regulation of Zn and Cu availability</i>                                           | <b>MT1E</b>   | M10942    | 534330 | 1.43  | 2.20  |
| ↑(23) <b>Cyclin D1 (PRAD1: parathyroid adenomatosis 1)</b><br><i>G1/S transition of mitotic cell cycle</i>                            | <b>CCND1</b>  | X59798    | 523852 | 1.40  | 2.83  |
| ↑(47) <b>Metallothionein 1B (functional)</b><br><i>Regulation of Zn and Cu availability</i>                                           | <b>MT1B</b>   | M13485    | 36102  | 1.20  | 0.16  |
| ↑(76) <b>Cysteine-rich protein 1 (intestinal)</b><br><i>Zn-binding protein. Mediation of MT activity (?)</i>                          | <b>CRIP1</b>  | D42123    | 70327  | 1.03  | 0.85  |
| ↑(112) <b>Plasminogen activator, urokinase</b><br><i>EC proliferation, release of ECM-growth factors</i>                              | <b>PLAU</b>   | X02419/   | 77274  | 0.92  | 0.42  |
| ↑(114) <b>Hypoxanthine phosphoribosyltransferase 1 (Lesch-Nyhan syndrome)</b><br><i>Regulation of purine metabolism</i>               | <b>HPRT1</b>  | M31642    | 412707 | 0.91  | 0.54  |
| ↑(130) <b>Hepatoma-derived growth factor (high-mobility group protein 1-like)</b><br><i>Positive regulator of EC proliferation</i>    | <b>HDGF</b>   | L24521    | 506748 | 0.84  | 0.21  |
| ↑(136) <b>Midkine (neurite growth-promoting factor 2)</b><br><i>Positive regulator of EC proliferation</i>                            | <b>MDK</b>    | X55110    | 82045  | 0.83  | 0.12  |
| <b>ADHESION</b>                                                                                                                       |               |           |        |       |       |
| ↓(6) <b>Kallikrein 9</b><br><i>Positive regulator of EC proliferation</i>                                                             | <b>KLK9</b>   | AF135026  | 448942 | -1.23 | 2.45  |
| ↓(18) <b>Kallikrein 12</b><br><i>Positive regulator of EC proliferation</i>                                                           | <b>KLK12</b>  | AF135025  | 411572 | -1.08 | 1.39  |
| ↓(19) <b>Kallikrein 11</b><br><i>Positive regulator of EC proliferation</i>                                                           | <b>KLK11</b>  | AB012917  | 57771  | -1.08 | 1.39  |
| <b>ADHESION</b>                                                                                                                       |               |           |        |       |       |
| ↑(8) <b>Connective tissue growth factor</b><br><i>Positive regulation of angiogenesis, ECM synthesis</i>                              | <b>CTGF</b>   | X78947    | 410037 | 1.80  | 6.71  |
| ↑(12) <b>Vinculin</b><br><i>Cytoskeletal actin-cell membrane, cell-cell, cell-ECM interaction</i>                                     | <b>VCL</b>    | NM_014000 | 75350  | 1.65  | 5.63  |
| ↑(13) <b>Laminin receptor 1 (ribosomal protein SA, 67 kDa)</b><br><i>Cell attachment to ECM</i>                                       | <b>LAMR1</b>  | U43901    | 374553 | 1.63  | 5.42  |
| ↑(17) <b>Profilin 1</b><br><i>Fibronectin adhesion, focal conctat formation,</i>                                                      | <b>PFN1</b>   | J03191    | 494691 | 1.54  | 4.51  |

|                                                                                                                                                |                |          |        |       |      |
|------------------------------------------------------------------------------------------------------------------------------------------------|----------------|----------|--------|-------|------|
| <i>cytoskeleton organization</i>                                                                                                               |                |          |        |       |      |
| ↑(20) <b>Sparc/osteonectin, cwcv and kazal-like domains proteoglycan (testican)</b><br><i>Cell adhesion</i>                                    | <b>SPOCK</b>   | AF231124 | 124611 | 1.46  | 3.15 |
| ↑(23) <b>Cyclin D1 (PRAD1: parathyroid adenomatosis 1)</b><br><i>Inside-out regulation of Rho-GTPases: cytoskeleton organization, adhesion</i> | <b>CCND1</b>   | X59798   | 523852 | 1.40  | 2.83 |
| ↑(30) <b>Cofilin 1 (non-muscle)</b><br><i>Actin cytoskeleton organization</i>                                                                  | <b>CFL1</b>    | X95404   | 180370 | 1.31  | 1.99 |
| ↑(65) <b>Calsyntenin 1</b><br><i>Cell adhesion</i>                                                                                             | <b>CLSTN1</b>  | AB020718 | 518451 | 1.07  | 1.41 |
| ↑(69) <b>A disintegrin and metalloproteinase domain 15 (metargidin)</b><br><i>Cell-cell, cell-ECM adhesion</i>                                 | <b>ADAM15</b>  | U41767   | 312098 | 1.06  | 1.32 |
| ↑(117) <b>Zyxin</b><br><i>Cell adhesion at focal contacts, actin cytoskeleton organization</i>                                                 | <b>ZYX</b>     | X95735   | 490415 | 0.90  | 0.42 |
| ↑(122) <b>Integrin beta 4 binding protein</b><br><i>Linking of basal lamina to the intermediate filament cytoskeleton in hemidesmosomes</i>    | <b>ITGB4BP</b> | AF022229 | 534326 | 0.89  | 0.38 |
| ↓(27) <b>Desmoglein 2 (DSG2)</b><br><i>Codherin cell adhesion molecule, homophilic cell adhesion</i>                                           | <b>DSG2</b>    | Z26317   | 412597 | -1.04 | 1.15 |
| ↓(32) <b>Tenascin N</b><br><i>ECM-integrin/syndecan interaction</i>                                                                            | <b>TNN</b>     | AL049689 | 156369 | -1.01 | 0.43 |
| ↓(33) <b>Glycoprotein IX (platelet)</b><br><i>Part of a cell surface receptor for von Willebrand factor</i>                                    | <b>GP9</b>     | X52997   | 1144   | -1.00 | 0.83 |
| ↓(54) <b>Immunoglobulin superfamily, member 1</b><br><i>Cell-cell interaction, cell-surface recognition</i>                                    | <b>IGSF1</b>   | AB002362 | 22111  | -0.86 | 0.29 |
| <b>ANGIOGENESIS INHIBITORS</b>                                                                                                                 |                |          |        |       |      |
| ↑ (11) <b>Pentaxin-related gene, rapidly induced by IL-1 beta</b><br><i>Inhibitory binding of FGF-2</i>                                        | <b>PTX3</b>    | M31166   | 546280 | 1.66  | 5.19 |
| ↑ (72) <b>Peptidylprolyl isomerase A (cyclophilin A)-like</b><br><i>Biphasic mediator of EC activation/dysfunction</i>                         | <b>PPIAL</b>   | AL021395 | 272279 | 1.05  | 0.01 |
| <b>ANGIOGENESIS UNKNOWN FUNCTIONS</b>                                                                                                          |                |          |        |       |      |
| ↓ (17) <b>CD1B antigen, b polypeptide</b><br><i>Pro-angiogenesis, induced by VEGF</i>                                                          | <b>CD1B</b>    | M28826   | 1310   | -1.09 | 1.52 |

M = differential expression ratio after dye-swap normalization; LOR=log odds ratio: all genes with LOR > 0 were considered significantly down-regulated (M<0) or up-regulated (M>0); in italics biological functions are reported; Each gene is univocally identifiable by a number ranging from 1 to 141 with an up-arrow meaning the up-regulation and from 1 to 58 with a down-arrow meaning the down-regulation in SSc-MVEC.
