# Supplementary material for: A model of anti-angiogenesis: differential transcriptosome profiling of microvascular endothelial cells from diffuse systemic sclerosis patients
Source: Springer Nature journal article supplement (doi:10.1186/ar2002), 2006-07-19
Supplement: Additional file 3 [file ar2002-s3.pdf]

**Additional file 3. Differentially expressed genes involved in apoptosis, haemostasis, inflammation and immunity.**

| Gene and biological function                                                                                                                                                   | Symbol          | GenBank    | Unigene | M     | LOR   |
|--------------------------------------------------------------------------------------------------------------------------------------------------------------------------------|-----------------|------------|---------|-------|-------|
| <b>APOPTOSIS</b>                                                                                                                                                               |                 |            |         |       |       |
| ↑(3) <b>Tumor necrosis factor receptor superfamily, member 6b, decoy</b><br><i>Secreted apoptosis inhibitor. Anti-apoptotic.</i>                                               | <b>TNFRSF6B</b> | (AF104419) | 434878  | 2.20  | 11.04 |
| ↑(29) <b>Proteoglycan 1, secretory granule</b><br><i>Member of a macromolecular complex with granzymes and perforin. Pro-apoptotic.</i>                                        | <b>PRG1</b>     | X17042     | 1908    | 1.32  | 2.61  |
| ↑(30) <b>Cofilin 1 (non-muscle)</b><br><i>Translocates to the mitochondria in the initiation phase of apoptosis. Pro-apoptotic</i>                                             | <b>CFL1</b>     | X95404     | 180370  | 1.31  | 1.99  |
| ↑(34) <b>Calpain 2, (m/II) large subunit</b><br><b>Involved in the pathway calpain/mitochondrial permeability transition pore (mPTP)/Cytochrome C caspase-3. Pro-apoptotic</b> | <b>CAPN2</b>    | M23254     | 350899  | 1.28  | 2.58  |
| ↑(38) <b>Serum/glucocorticoid regulated kinase</b><br><i>Modulates the transcriptional activity of nuclear transcription factor kappa B (NF-kB). Anti-apoptotic</i>            | <b>SGK</b>      | AJ000512   | 296323  | 1.27  | 2.66  |
| ↑(42) <b>Macrophage migration inhibitory factor (glycosylation-inhibiting factor)</b><br><i>Promotes phosphorylation of MEK1/2, Erk1/2, Elk-1, PI3K, Akt. Anti-apoptotic</i>   | <b>MIF</b>      | L19686     | 407995  | 1.24  | 2.43  |
| ↑(44) <b>Phosphoprotein enriched in astrocytes 15</b><br><i>Mediates the Akt survival signalling. Anti-apoptotic</i>                                                           | <b>PEA15</b>    | L37385     | 517216  | 1.23  | 2.36  |
| ↑(64) <b>Mitochondrial carrier homolog 1 (C. elegans)</b><br><i>Release of cytochrome C, activation of caspase 3. Pro-apoptotic</i>                                            | <b>MTCH1</b>    | NM_014341  | 485262  | 1.08  | 1.24  |
| ↑(106) <b>V-akt murine thymoma viral oncogene homolog 1</b><br><i>Promotes cell proliferation and survival. Anti-apoptotic</i>                                                 | <b>AKT1</b>     | M63167     | 525622  | 0.94  | 0.40  |
| ↓(20) <b>Caspase 14, apoptosis-related cysteine protease</b><br><b>Proteolytic effector of apoptosis. Pro-apoptotic</b>                                                        | <b>CASP14</b>   | AF097874   | 248226  | -1.07 | 0.96  |
| ↓(35) <b>Serine/threonine kinase 17a (apoptosis-inducing)</b><br><i>Localized in the nucleus, induces the morphologic changes typical of apoptosis. Pro-apoptotic</i>          | <b>STK17A</b>   | AB011420   | 268887  | -0.98 | 0.71  |
| ↓(45) <b>BCL2-like 11 (apoptosis facilitator)</b><br><i>Belongs to the family of BCL2 proteins. Anti-apoptotic</i>                                                             | <b>BCL2L11</b>  | AF032457   | 469658  | -0.92 | 0.39  |
| ↓(48) <b>unc-5 homolog B (C. elegans)</b><br><i>Belongs to the family of netrin-1 receptors, putative tumor suppressors by control of cell death commitment. Pro-apoptotic</i> | <b>UNC5B</b>    | AB09256    | 522997  | -0.89 | 0.48  |
| ↓(56) <b>Sodium channel, voltage-gated, type III, beta</b><br><i>Mediated a P53-dependent apoptotic pathway. Pro-apoptotic</i>                                                 | <b>SCN3B</b>    | AB032984   | 4865    | -0.83 | 0.17  |

| <b>HAEMOSTASIS</b>                                                                                                                                                       |               |           |        |       |       |
|--------------------------------------------------------------------------------------------------------------------------------------------------------------------------|---------------|-----------|--------|-------|-------|
| ↑(2) <b>Plasminogen activator, tissue</b><br><i>Positive regulation of fibrinolysis</i>                                                                                  | <b>PLAT</b>   | M15518    | 491582 | 2.23  | 11.50 |
| ↑(10) <b>Enolase 1, (alpha)</b><br><i>Activation of plasminogen on endothelial cell surface</i>                                                                          | <b>ENO1</b>   | M14328    | 517145 | 1.67  | 5.79  |
| ↑(11) <b>Pentaxin-related gene, rapidly induced by IL-1 beta</b><br><i>Increases Tissue Factor expression on endothelial cell</i>                                        | <b>PTX3</b>   | M31166    | 546280 | 1.66  | 5.19  |
| ↑(92) <b>Prion protein (p27-30) (Creutzfeld-Jakob disease, Gerstmann-Strausler-Scheinker syndrome, fatal familial insomnia)</b><br><i>Activation of plasminogen.....</i> | <b>PRNP</b>   | U29185    | 472010 | 0.97  | 0.52  |
| ↑(100) <b>Membrane cofactor protein (CD46, trophoblast-lymphocyte cross-reactive antigen)</b><br><i>Maintains the haemostatic balance of endothelial cell</i>            | <b>MCP</b>    | X59405    | 510402 | 0.95  | 0.74  |
| ↑(110) <b>Thrombomodulin</b><br><i>Increases the anti-coagulant properties of the endothelial cell</i>                                                                   | <b>THBD</b>   | J02973    | 2030   | 0.93  | 0.62  |
| ↑(112) <b>Plasminogen activator, urokinase</b><br><i>Positive regulation of fibrinolysis</i>                                                                             | <b>PLAU</b>   | X02419/   | 77274  | 0.92  | 0.42  |
|                                                                                                                                                                          |               |           |        |       |       |
| ↓(13) <b>Prostaglandin D2 synthase 21kDa (brain)</b><br><i>Inhibitor of platelet aggregation</i>                                                                         | <b>PTGDS</b>  | NM_000954 | 446429 | -1.14 | 1.84  |
| ↓(33) <b>Glycoprotein IX (platelet)</b><br><i>Cell surface receptor for von Willebrand factor, possibly mediating platelet adhesion</i>                                  | <b>GP9</b>    | X52997    | 1144   | -1.00 | 0.83  |
| ↓(50) <b>Protease, serine, 1 (trypsin 1)</b><br><i>Negative regulation of blood coagulation</i>                                                                          | <b>PRSS1</b>  | M22612    | 511525 | -0.89 | 0.39  |
|                                                                                                                                                                          |               |           |        |       |       |
| <b>INFLAMMATION AND IMMUNITY</b>                                                                                                                                         |               |           |        |       |       |
| ↑(11) <b>Pentaxin-related gene, rapidly induced by IL-1 beta</b><br><i>Produced during sepsis. Complement activation and generation of inflammation mediators</i>        | <b>PTX3</b>   | M31166    | 546280 | 1.66  | 5.19  |
| ↑(36) <b>Interferon induced transmembrane protein 2 (1-8D)</b><br><i>Produced in response to type I and type II interferons</i>                                          | <b>IFITM2</b> | X57351    | 174195 | 1.27  | 2.12  |
| ↑(40) <b>Beta-2-microglobulin</b><br><i>Component of MHC class I complex. Present in peri-vascular amyloid deposits</i>                                                  | <b>B2M</b>    | AB021288  | 534255 | 1.26  | 2.56  |
| ↑(56) <b>Interleukin enhancer binding factor 2, 45kDa</b><br><i>Transcription factor required for expression of interleukin 2 (IL-2) gene</i>                            | <b>ILF2</b>   | U10323    | 75117  | 1.15  | 1.89  |
|                                                                                                                                                                          |               |           |        |       |       |
| ↓(3) <b>Lipopolysaccharide binding protein</b><br><i>Upon binding with endotoxins it interacts with Toll-like receptors, thus generating inflammation mediators</i>      | <b>LBP</b>    | AF013512  | 154078 | -1.77 | 6.68  |
| ↓(25) <b>Fc fragment of IgE, high affinity I, receptor for; alpha polypeptide</b><br><i>IgE binding in allergic disease</i>                                              | <b>FCER1A</b> | X06948    | 897    | -1.04 | 0.84  |
| ↓(31) <b>Azurocidin 1 (cationic antimicrobial protein 37)</b>                                                                                                            | <b>AZU1</b>   | M96326    | 72885  | -1.02 | 1.11  |

|                                                                                                                                                                          |               |        |        |       |      |
|--------------------------------------------------------------------------------------------------------------------------------------------------------------------------|---------------|--------|--------|-------|------|
| <i>Favors cell adhesion</i>                                                                                                                                              |               |        |        |       |      |
| ↓(58) <b>Fc fragment of IgG, low affinity IIa, receptor for (CD32)</b><br><i>Phagocytosis of immune complexes and modulation of antibody production by B lymphocytes</i> | <b>FCGR2A</b> | M31932 | 352642 | -0.82 | 0.12 |

M = differential expression ratio after dye-swap normalization; LOR=log odds ratio: all genes with LOR > 0 were considered significantly down-regulated (M<0) or up-regulated (M>0); in italics biological functions are reported; Each gene is univocally identifiable by a number ranging from 1 to 141 with an up-arrow meaning the up-regulation and from 1 to 58 with a down-arrow meaning the down-regulation in SSc-MVEC.
