# Supplementary material for: A model of anti-angiogenesis: differential transcriptosome profiling of microvascular endothelial cells from diffuse systemic sclerosis patients
Source: Springer Nature journal article supplement (doi:10.1186/ar2002), 2006-07-19
Supplement: Additional file 5 [file ar2002-s5.pdf]

**Additional file 5. Differentially expressed genes involved in stimulus transduction, DNA/RNA organization, transcription.**

| Gene and biological function                                                                                                                                                           | Symbol         | GenBank   | Unigene | M    | LOR  |
|----------------------------------------------------------------------------------------------------------------------------------------------------------------------------------------|----------------|-----------|---------|------|------|
| <b>STIMULUS TRANSDUCTION</b>                                                                                                                                                           |                |           |         |      |      |
| ↑(24) <b>Gap junction protein, alpha 1, 43kDa (connexin 43)</b><br><i>Activates the gap junction molecular complex. Positive regulation of I-kB kinase/NF-kB cascade</i>               | <b>GJA1</b>    | NM_000165 | 74471   | 1.39 | 3.55 |
| ↑(26) <b>Hippocalcin-like 1</b><br><i>Calcium-dependent regulation of cell-signaling</i>                                                                                               | <b>HPCAL1</b>  | AK000596  | 467696  | 1.36 | 3.36 |
| ↑(30) <b>Cofilin 1 (non-muscle)</b><br><i>Rho phosphorylates LIM kinases, which phosphorylate cofilin, thus blocking endothelial migratory signals</i>                                 | <b>CFL1</b>    | X95404    | 180370  | 1.31 | 1.99 |
| ↑(33) <b>Ras-related C3 botulinum toxin substrate 2 (rho family, small GTP binding protein Rac2)</b><br><i>Small GTPase-mediated signal transduction</i>                               | <b>RAC2</b>    | Z82188    | 517601  | 1.30 | 2.90 |
| ↑(38) <b>Serum/glucocorticoid regulated kinase</b><br><i>Protein serine/threonine kinase activity</i>                                                                                  | <b>SGK</b>     | AJ000512  | 296323  | 1.27 | 1.27 |
| ↑(54) <b>Ras-GTPase-activating protein SH3-domain-binding protein</b><br><i>Ras protein signal transduction</i>                                                                        | <b>G3BP</b>    | U32519    | 3353    | 1.16 | 0.25 |
| ↑(55) <b>Interleukin 6 signal transducer (gp130, oncostatin M receptor)</b><br><i>Signal transducer which is part of many cytokine-receptor complex</i>                                | <b>IL6ST</b>   | AL049265  | 532082  | 1.15 | 1.83 |
| ↑(61) <b>Rho GDP dissociation inhibitor (GDI) beta</b><br><i>Inhibits dissociation of GDP from Rho, thus blocking Rho-dependent signal transductions</i>                               | <b>ARHGDI2</b> | L20688    | 504877  | 1.10 | 1.09 |
| ↑(70) <b>Guanine nucleotide binding protein (G protein), gamma 10</b><br><i>G-protein-coupled receptor protein signalling pathway</i>                                                  | <b>GNG10</b>   | U31383    | 534196  | 1.05 | 1.30 |
| ↑(71) <b>Peroxiredoxin 4 (PRDX4)</b><br><i>Regulatory role in activation of NF-kB: depletion of NFkB activity</i>                                                                      | <b>PRDX4</b>   | U25182    | 83383   | 1.05 | 1.28 |
| ↑(83) <b>Ras homolog gene family, member A</b><br><i>GTP binding, GTPase activity, Rho protein signal transduction</i>                                                                 | <b>RHOA</b>    | L09159    | 247077  | 1.02 | 1.10 |
| ↑(85) <b>Dual specificity phosphatase 3 (vaccinia virus phosphatase VH1-related)</b><br><i>Inactivation of MAP kinase by de-phosphorylation: Cell growth inhibition, pro-apoptotic</i> | <b>DUSP3</b>   | AL049417  | 181046  | 1.01 | 0.22 |
| ↑(93) <b>ADP-ribosylation factor 4</b><br><i>GTP binding, GTPase activity. Small GTPase-mediated signal transduction</i>                                                               | <b>ARF4</b>    | NM_001660 | 148330  | 0.97 | 0.51 |
| ↑(95) <b>Guanine nucleotide binding protein (G protein), beta polypeptide 1</b><br><i>GTP binding, GTPase activity. Small GTPase-mediated signal transduction</i>                      | <b>GNB1</b>    | X04526    | 430425  | 0.96 | 0.68 |
| ↑(98) <b>Tyrosine 3-monooxygenase/tryptophan 5-</b>                                                                                                                                    | <b>YWHAE</b>   | U54778    | 513851  | 0.95 | 0.71 |

|                                                                                                                                                                                                                         |                    |           |        |       |       |
|-------------------------------------------------------------------------------------------------------------------------------------------------------------------------------------------------------------------------|--------------------|-----------|--------|-------|-------|
| <b>monooxygenase activation protein, epsilon polypeptide</b><br><i>Regulates signal transduction by binding to phosphoserine-containing proteins</i>                                                                    |                    |           |        |       |       |
| ↑(101) <b>Protein phosphatase 2 (formerly 2A), catalytic subunit, alpha isoform</b><br><i>Inactivation of MAP kinase by de-phosphorylation<br/>Cell growth inhibition, pro-apoptotic</i>                                | <b>PPP2CA</b>      | M60483    | 483408 | 0.95  | 0.45  |
| ↑(102) <b>Histidine triad nucleotide binding protein 1</b><br><i>PKC-interacting protein: inhibition of PKC</i>                                                                                                         | <b>HINT1</b>       | U51004    | 483305 | 0.95  | 0.68  |
| ↑(106) <b>V-akt murine thymoma viral oncogene homolog 1</b><br><i>MAPK signalling pathway. Toll-like receptor signalling pathway. Jak-STAT signalling pathway</i>                                                       | <b>AKT1</b>        | M63167    | 525622 | 0.94  | 0.40  |
| ↑(115) <b>MAP kinase interacting serine/threonine kinase 2</b><br><i>Directly phosphorylated by ERK and MAPK. Regulation of protein synthesis by phosphorylation<br/>of eukaryotic translation initiation factor 4E</i> | <b>MKNK2/GPRK7</b> | AL137615  | 515032 | 0.90  | 0.47  |
| ↑(116) <b>ADP-ribosylation factor 1</b><br><i>GTP binding, GTPase activity. Small GTP-ase mediated signal transduction</i>                                                                                              | <b>ARF1</b>        | AK000620  | 286221 | 0.90  | 0.44  |
| ↑(117) <b>Zyxin</b><br><i>Messenger in the signal transduction pathways that mediates adhesion-stimulated changes in gene expression</i>                                                                                | <b>ZYX</b>         | X95735    | 490415 | 0.90  | 0.42  |
| ↑(129) <b>Parkinson disease (autosomal recessive, early onset) 7</b><br><i>Involved in Ras protein signal transduction</i>                                                                                              | <b>PARK7</b>       | AF021819  | 419640 | 0.85  | 0.23  |
| ↑(135) <b>Exostoses (multiple) 1</b><br><i>Signal transduction involved in the negative regulation of cell cycle</i>                                                                                                    | <b>EXT1</b>        | NM_000127 | 492618 | 0.83  | 0.11  |
| ↑(141) <b>Dual specificity phosphatase 1</b><br><i>Inactivates target kinases by de-phosphorylation of both phosphoserine/threonine and phosphotyrosine residues.<br/>Inactivation of MAPK/ ERK, SAPK/JNK, p38</i>      | <b>DUSP1</b>       | NM_004417 | 171695 | 0.80  | 0.002 |
|                                                                                                                                                                                                                         |                    |           |        |       |       |
| ↓(9) <b>Plexin B1</b><br><i>Binding of semaphorin 4D to PLXNB1 stimulates tyrosine kinase activity of MET, by acting as a GTPase-activating protein for a member of the RAS superfamily</i>                             | <b>PLXNB1</b>      | AJ011414  | 476209 | -1.19 | 1.99  |
| ↓(23) <b>Mitogen-activated protein kinase kinase kinase 1</b><br><i>Specific mammalian STE20-like protein serine/threonine kinase, involved in many cellular signalling cascades</i>                                    | <b>MAP4K1</b>      | U66464    | 95424  | -1.05 | 1.20  |
| ↓(37) <b>5-hydroxytryptamine (serotonin) receptor 1F</b><br><b>Member of the G-protein-coupled receptor super-family. Coupled with activation of Erk/ MAPK pathways</b>                                                 | <b>HTR1F</b>       | L05597    | 248136 | -0.97 | 0.83  |
| ↓(47) <b>RAB5B, member RAS oncogene family</b><br><i>Small, monomeric GTPase, belonging to the RAS Super-family</i>                                                                                                     | <b>RAB5B</b>       | X54871    | 77690  | -0.90 | 0.37  |

|                                                                                                                                                                                                                  |                    |           |        |       |      |
|------------------------------------------------------------------------------------------------------------------------------------------------------------------------------------------------------------------|--------------------|-----------|--------|-------|------|
| ↓(50) <b>HIV-1 Rev binding protein-like</b><br><i>Member of a family of signal transducers with Extensive networking abilities, including Eps15-homology domain-mediate binding with SH3-containing proteins</i> | <b>HRBL</b>        |           |        |       |      |
|                                                                                                                                                                                                                  |                    | AF053356  | 521083 | -0.88 | 0.35 |
| ↓(51) <b>Ropporin, raphilin associated protein 1</b><br><i>Protein shown to interact with Rho signalling pathway through raphilin</i>                                                                            | <b>ROPN1</b>       | AL133624  | 458304 | -0.87 | 0.35 |
| <b>DNA/RNA ORGANIZATION</b>                                                                                                                                                                                      |                    |           |        |       |      |
| ↑(5) <b>Shwachman-Bodian-Diamond syndrome</b><br><i>Rna metabolism</i>                                                                                                                                           | <b>SBDS/CGI-97</b> | AK001779  | 110445 | 2.14  | 9.24 |
| ↑(10) <b>Enolase 1, (alpha)</b><br><i>Regulation of transcription</i>                                                                                                                                            | <b>ENO1</b>        | M14328    | 517145 | 1.67  | 5.79 |
| ↑(25) <b>H3 histone, family 3B (H3.3B)</b><br><i>Genome stabilization. Nucleosome assembly</i>                                                                                                                   | <b>H3F3B</b>       | Z48950    | 180877 | 1.37  | 3.41 |
| ↑(86) <b>Pituitary tumor-transforming 1</b><br><i>Control of DNA replication and chromosome cycle and regulation of chromosome segregation</i>                                                                   | <b>PTTG1</b>       | AJ223953  | 350966 | 1.01  | 0.66 |
| ↑(90) <b>Polymerase (RNA) II (DNA directed) polypeptide L, 7. 6kDa</b><br><i>Regulation of transcription</i>                                                                                                     | <b>POLR2L</b>      | U37690    | 441072 | 0.98  | 0.53 |
| ↑(94) <b>Thioredoxin-like 4A</b><br><i>Component of the spliceosome complex</i>                                                                                                                                  | <b>TXNL4A</b>      | AF023612  | 465498 | 0.96  | 0.73 |
| ↑(103) <b>Suppressor of Ty 16 homolog (S. cerevisiae)</b><br><i>Nucleosome dys-assembly</i>                                                                                                                      | <b>SUPT16H</b>     | NM_007192 | 213724 | 0.94  | 0.62 |
| ↑(111) <b>Heterogeneous nuclear ribonucleoprotein K</b><br><i>DNA and RNA binding, chromatin remodelling, transcription and splicing</i>                                                                         | <b>HNRPK</b>       | X72727    | 522257 | 0.92  | 0.31 |
| ↑(118) <b>Aurora-A kinase interacting protein</b><br><i>Inhibitor of Aurora-A kinases, that regulate structure and function of centrosomes and spindle</i>                                                       | <b>AKIP</b>        | AK000615  | 472535 | 0.89  | 0.38 |
| ↑(120) <b>Structure specific recognition protein 1</b><br><i>Nucleosome dys-assembly and chromatin transcription elongation factor</i>                                                                           | <b>SSRP1</b>       | M86737    | 523680 | 0.89  | 0.36 |
| ↑(121) <b>RNA polymerase II associated protein 1</b><br><i>Function unknown</i>                                                                                                                                  | <b>RPAP1</b>       | AB037824  | 371045 | 0.89  | 0.36 |
| ↑(137) <b>5'-nucleotidase, cytosolic III</b><br><i>Regulation of nucleotide catabolism</i>                                                                                                                       | <b>NT5C3</b>       | AF151067  | 487933 | 0.83  | 0.13 |
| ↓(7) <b>TruB pseudouridine (psi) synthase homolog 2 (E.coli)</b><br><i>RNA modifications, control of telomerase activity</i>                                                                                     | <b>TRUB2</b>       | AF131848  | 98541  | -1.23 | 2.38 |
| ↓(14) <b>Arginine vasopressin-induced 1 (AVPI1)</b><br><i>Positive regulator of cell cycle</i>                                                                                                                   | <b>AVPI1</b>       | AF131791  | 23918  | -1.12 | 1.73 |
| ↓(21) <b>Chromosome 1 open reading frame 34</b><br><i>Function unknown</i>                                                                                                                                       | <b>C1orf34</b>     | AK000220  | 112949 | -1.05 | 1.28 |
| ↓(26) <b>Myogenic factor 5</b><br><i>Regulation of transcription from RNA polymerase II promoter</i>                                                                                                             | <b>MYF5</b>        | X14894    | 178023 | -1.04 | 0.25 |
| ↓(38) <b>Trinucleotide repeat containing 4</b><br><i>Regulation of alternative splicing</i>                                                                                                                      | <b>TNRC4</b>       | U80759    | 26047  | -0.96 | 0.71 |
| ↓(42) <b>DEAD (Asp-Glu-Ala-Asp) box polypeptide 41</b><br><i>Putative RNA elicase, involved in RNA processing and metabolism</i>                                                                                 | <b>DDX41</b>       | AK001255  | 484288 | -0.94 | 0.58 |

| <b>TRANSCRIPTION</b>                                                                                                                                                                                                                                                                              |               |           |               |       |      |
|---------------------------------------------------------------------------------------------------------------------------------------------------------------------------------------------------------------------------------------------------------------------------------------------------|---------------|-----------|---------------|-------|------|
| ↑(45) <b>Basic transcription factor 3, like 3</b><br><i>Transcription factor</i>                                                                                                                                                                                                                  | <b>BTF3L3</b> | M90356    | 181967/447132 | 1.21  | 2.14 |
| ↑(56) <b>Interleukin enhancer binding factor 2, 45kDa</b><br><i>Transcription factor required for expression of Interleukin2 (IL-2) gene</i>                                                                                                                                                      | <b>ILF2</b>   | U10323    | 75117         | 1.15  | 1.89 |
| ↑(84) <b>High mobility group AT-hook 1</b><br><i>Regulator of inducible genes transcription</i>                                                                                                                                                                                                   | <b>HMGA1</b>  | L17131    | 518805        | 1.01  | 0.11 |
| ↑(125) <b>Basic transcription factor 3, like 1</b><br><b>Transcription factor</b>                                                                                                                                                                                                                 | <b>BTF3L1</b> | M90354    | 181965        | 0.89  | 0.36 |
| ↓(1) <b>GATA binding protein 6</b><br><i>Transcription factor, control of vWF expression</i>                                                                                                                                                                                                      | <b>GATA6</b>  | X95701    | 514746        | -2.19 | 8.77 |
| ↓(2) <b>SRY (sex determining region Y)-box 9 (campomelic dysplasia, autosomal sex-reversal)</b><br><i>Transcription factor (unknown function in endothelial cell)</i>                                                                                                                             | <b>SOX9</b>   | NM_000346 | 2316          | -1.99 | 7.44 |
| ↓(10) <b>Runt-related transcription factor 2</b><br><i>Member of the Ig-loop family of transcription factors, regulates endothelial cell migration and invasion</i>                                                                                                                               | <b>RUNX2</b>  | L40992    | 122116        | -1.16 | 1.48 |
| ↓(12) <b>Nuclear factor of activated T-cells 5, tonicity-responsive</b><br><i>Transcription factor, important in regulation of gene expression during osmotic stress</i>                                                                                                                          | <b>NFAT5</b>  | AF089824  | 371987        | -1.14 | 1.51 |
| ↓(15) <b>SRY (sex determining region Y)-box 5 pseudogene</b><br><i>Transcription factor (unknown function in endothelial cell)</i>                                                                                                                                                                | <b>SOX5P</b>  | AF032454  | 248220        | -1.12 | 1.45 |
| ↓(16) <b>Forkhead box A2</b><br><i>Transcription factor</i>                                                                                                                                                                                                                                       | <b>FOXA2</b>  | AB028021  | 155651        | -1.10 | 1.59 |
| ↓(39) <b>Sine oculis homeobox homolog 4 (Drosophila)</b><br><i>Transcription factor which binds to AU- rich elements</i>                                                                                                                                                                          | <b>SIX4</b>   | NM_017420 | 279004        | -0.95 | 0.43 |
| ↓(44) <b>Nuclear factor of kappa light polypeptide gene enhancer in B-cells 2 (p49/p100)</b><br><i>Transcription factor, activated by a wide variety of stimuli. Complete and persistent inhibition of NF-kB has been linked directly to apoptosis, delayed cell growth and anti-angiogenesis</i> | <b>NFKB2</b>  | S76638    | 73090         | -0.93 | 0.06 |

M = differential expression ratio after dye-swap normalization; LOR=log odds ratio: all genes with LOR > 0 were considered significantly down-regulated (M<0) or up-regulated (M>0); in italics biological functions are reported; Each gene is univocally identifiable by a number ranging from 1 to 141 with an up-arrow meaning the up-regulation and from 1 to 58 with a down-arrow meaning the down-regulation in SSc-MVEC.
